# Supplementary material for: A Circle RNA Regulatory Axis Promotes Lung Squamous Metastasis via CDR1-Mediated Regulation of Golgi Trafficking
Source: Oxford University Press journal article supplement (doi:10.1158/0008-5472.can-20-1162), 2020-09-25
Supplement: 00085472can201162-sup-240945_2_supp_6559247_qgny57.xlsx [file 00085472can201162-sup-240945_2_supp_6559247_qgny57.xlsx]

## Sheet: S1
Supplementary Table 2. miRs individually associated with survival in LUSC TCGA based on median expression of miR genes. FDR values were calculated considering the whole set of genes tested (N=387).
Gene	Median	Survival P-value	Survival HR	Survival HR 95% CI Lower Bound	Survival HR 95% CI Upper Bound	Survival FDR
hsa-mir-100	4509.54	0.036109	1.47273	1.02538	2.11523	0.60983
hsa-mir-106b	775.257	0.019324	0.649747	0.452737	0.932486	0.541255
hsa-mir-128-1	122.855	0.001827	0.559503	0.388343	0.8061	0.176792
hsa-mir-128-2	90.9719	0.000221	0.500196	0.346338	0.722405	0.085485
hsa-mir-1301	18.3053	0.003889	0.587182	0.409066	0.842853	0.25083
hsa-mir-15a	131.422	0.037819	0.679965	0.472492	0.978539	0.60983
hsa-mir-16-1	791.226	0.047531	0.693749	0.483204	0.996033	0.616779
hsa-mir-16-2	16.3558	0.019207	0.648178	0.450889	0.931794	0.541255
hsa-mir-181d	15.1905	0.007098	0.598961	0.412418	0.86988	0.343384
hsa-mir-196a-1	39.4754	0.042914	1.45386	1.012	2.08864	0.615098
hsa-mir-196a-2	1.48393	0.001174	1.84281	1.27391	2.66578	0.151421
hsa-mir-204	5.72212	0.048314	0.695116	0.484487	0.997315	0.616779
hsa-mir-218-2	53.6946	0.03249	0.674657	0.470348	0.967712	0.60983
hsa-mir-221	286.174	0.00234	0.56409	0.390128	0.815624	0.181119
hsa-mir-3200	4.32355	0.019025	0.644617	0.446597	0.930439	0.541255
hsa-mir-369	7.63848	0.036711	0.67873	0.471829	0.97636	0.60983
hsa-mir-374a	853.46	0.026982	0.66417	0.462156	0.954486	0.60983
hsa-mir-421	4.53967	0.040471	0.684353	0.476111	0.983676	0.615098
hsa-mir-450a-1	3.56428	0.011576	0.62678	0.436131	0.90077	0.497767
hsa-mir-452	141.439	0.046853	0.693507	0.483404	0.994927	0.616779
hsa-mir-500a	224.29	0.035901	0.678155	0.471798	0.974769	0.60983
hsa-mir-501	47.7403	0.005148	0.59522	0.413827	0.856123	0.284597
hsa-mir-505	52.975	0.03059	0.671559	0.468113	0.963424	0.60983
hsa-mir-542	170.332	0.041843	0.686186	0.477438	0.986203	0.615098
hsa-mir-653	8.72409	0.016159	0.639595	0.44437	0.920589	0.541255
hsa-mir-671	12.5115	0.029817	0.669174	0.46574	0.961466	0.60983
hsa-mir-767	9.9669	0.01958	1.54649	1.07241	2.23015	0.541255
hsa-mir-93	7180.66	0.000921	0.538168	0.373037	0.776398	0.151421
hsa-mir-98	60.0193	0.033209	0.67418	0.469012	0.969099	0.60983
hsa-mir-99b	21817.6	0.023946	1.53582	1.05826	2.2289	0.60983
