# Supplementary material for: A Circle RNA Regulatory Axis Promotes Lung Squamous Metastasis via CDR1-Mediated Regulation of Golgi Trafficking
Source: Oxford University Press journal article supplement (doi:10.1158/0008-5472.can-20-1162), 2020-09-25
Supplement: 00085472can201162-sup-240945_2_supp_6559248_qgny58.xlsx [file 00085472can201162-sup-240945_2_supp_6559248_qgny58.xlsx]

## Sheet: S1
Supplementary Table 4. Candidate target genes for miR-671-5p, values based on median expression of miR-671-5p and candidate genes.
	Expression		Survival		Correlation		miR-671-5p Influence	Joint Survival with miR-671-5p
mRNAGeneSymbol	Mean	Median	P Value	HR	r	FDR	Gene Variation	P Value	HR
TGM2	5316.95	3700.31	0.000778	1.87424	-0.29875	2.10467e-07	0.692826	0.000161	2.53818
LOXL2	1488.64	935.476	0.000605	1.89257	-0.302328	1.50979e-07	0.660262	0.000157	2.33499
KIF13B	515.694	433.796	0.008152	1.62912	-0.292163	3.67882e-07	0.72427	0.001489	2.26465
DLC1	511.606	360.365	0.00749	1.63774	-0.270986	2.30408e-06	0.646669	0.001382	2.14668
MSR1	897.113	634.55	0.013244	1.58631	-0.259556	5.75248e-06	0.702923	0.002509	2.14602
MXRA8	1296.92	1000.24	0.006285	1.65525	-0.28979	4.32257e-07	0.658542	0.001153	2.14381
CCDC69	582.85	477.254	0.014043	1.58056	-0.281804	8.56217e-07	0.740058	0.002378	2.12479
ANTXR2	714.502	601.268	0.024031	1.51684	-0.277222	1.27845e-06	0.704769	0.00196	2.10574
IL16	466.92	386.092	0.023009	1.52807	-0.293804	3.276e-07	0.746412	0.003143	2.08516
VGLL3	382.133	217.935	0.012988	1.58255	-0.32877	1.3284e-08	0.448156	0.001843	2.03387
AOC3	690.802	489.88	0.009488	1.61525	-0.327272	1.50771e-08	0.579158	0.003051	2.02053
CD93	1209.4	942.618	0.016706	1.55157	-0.326308	1.50928e-08	0.696357	0.002768	2.0159
CSRNP1	600.633	480.852	0.017376	1.55102	-0.254051	9.34969e-06	0.742059	0.003012	2.01584
