# Supplementary material for: A Circle RNA Regulatory Axis Promotes Lung Squamous Metastasis via CDR1-Mediated Regulation of Golgi Trafficking
Source: Oxford University Press journal article supplement (doi:10.1158/0008-5472.can-20-1162), 2020-09-25
Supplement: 00085472can201162-sup-240945_2_supp_6559252_qgny58.xlsx [file 00085472can201162-sup-240945_2_supp_6559252_qgny58.xlsx]

## Sheet: Sheet1
Supplementary Table 1. Sequences of shRs and RT-qPCR primers.
Scr shR	sense	TGTACTCTCCTCCCCTCAATTTCAAGAGAATTGAGGGGAGGAGAGTACTTTTTTCTC
	antisense	TCGAGAAAAAAGTACTCTCCTCCCCTCAATTCTCTTGAAATTGAGGGGAGGAGAGTACA
CDR1as shR1	sense	TGCACCTGTGTCAAGGTCTTTTCAAGAGAAAGACCTTGACACAGGTGCTTTTTTC
	antisense	TCGAGAAAAAAGCACCTGTGTCAAGGTCTTTCTCTTGAAAAGACCTTGACACAGGTGCA
CDR1as shR2	sense	TTCCAACAACTCCGGGTCTTTTCAAGAGAAAGACCCGGAGTTGTTGGATTTTTTC
	antisense	TCGAGAAAAAATCCAACAACTCCGGGTCTTTCTCTTGAAAAGACCCGGAGTTGTTGGAA
CDR1as divergent	Forward	AGACCTTGAGATTATTGGAAGACTTGA
	Reverse	TACCCAGTCTTCCATCAACTGGCT
CDR1 strand specific	RT primer	ACTTGCCTCAGTTCGCTACTAGTCTTCCGGATAATTTGG
	Forward	AGGCCATTGGAAGATGTG
	Reverse	ACTTGCCTCAGTTCGCTACT
MSR1	Forward	CAAAGCTGTCATTGAGCGAG
	Reverse	TGCTGCTTTCTTTAGGACGA
CD93	Forward	CCGGAAGTAACATTGAGGGCT
	Reverse	TCTGAGTCTCGTCCTTGTCAC
IL-16	Forward	GCCGAAGACCCTTGGGTTAG
	Reverse	GCTGGCATTGGGCTGTAGA
VGLL3	Forward	CCAGGGAGACATTGGGTCAG
	Reverse	AGTTGGGAAACTATTCCGCTG
FOXM1	Forward	CGTCGGCCACTGATTCTCAAA
	Reverse	GGCAGGGGATCTCTTAGGTTC
CCDC69	Forward	GGAGACCATAGACAGACTGACC
	Reverse	GTTTCGGCTCAGAATGGACTC
KIF13B	Forward	AGCCGAAGGTGTTTGCTTATG
	Reverse	TGAGTTCGTTCAAAGAGTCCACT
AO3C	Forward	AGCAGCAGCTCAAGTTAGCA
	Reverse	AGGGGCTTTGGCTTCTCATC
DLC1	Forward	TGAATGAACCGGAAGAGCCC
	Reverse	ATCTCAGTCGGTGCCTGTTG
ANTXR2	Forward	CAACTTGCGGAGAGATTTGTGA
	Reverse	CAAGCCTCCTGCTTTCTGAAT
CSRNP1	Forward	TGGCCGGTTGGAAGAAGTG
	Reverse	GCAGATCCTATCGCAGTGACAG
LOXL2	Forward	GGGTGGAGGTGTACTATGATGG
	Reverse	CTTGCCGTAGGAGGAGCTG
TGM2	Forward	CAAGGCCCGTTTTCCACTAAG
	Reverse	GAGGCGATACAGGCCGATG
MXRA8	Forward	GCAACCTGCACCATCACTACT
	Reverse	CCACCTGTTGAGCCTCCTC
PAK1	Forward	CAGCCCCTCCGATGAGAAATA
	Reverse	CAAAACCGACATGAATTGTGTGT
ABCC1	Forward	TTACTCATTCAGCTCGTCTTGTC
	Reverse	CAGGGATTAGGGTCGTGGAT
PIK3R3	Forward	CTTTGCGGAAGGGAGGCAATA
	Reverse	ACCACGGAATTAAATGTCAGAGG
EGFR	Forward	CGAGGGCAAATACAGCTT
	Reverse	GCCGTCTTCCTCCATCT
IRS2	Forward	TCTTGTCCCACCACTTGA
	Reverse	CAGTGCTGAGCGTCTTCT
RAF1	Forward	GGGAGCTTGGAAGACGATCAG
	Reverse	ACACGGATAGTGTTGCTTGTC
SNCA	Forward	CTGCTGCTGAGAAAACCA
	Reverse	CCTTGGTTTTGGAGCCTA
BCL2	Forward	GGTGGGGTCATGTGTGTGG
	Reverse	CGGTTCAGGTACTCAGTCATCC
RELA	Forward	CCCACGAGCTTGTAGGAAAGG
	Reverse	GGATTCCCAGGTTCTGGAAAC
CDH1	Forward	GACCGGTGCAATCTTCAAA
	Reverse	TTGACGCCGAGAGCTACAC
TWIST1	Forward	GTCCGCAGTCTTACGAGGAG
	Reverse	GCTTGAGGGTCTGAATCTTGCT
ZEB1	Forward	TTACACCTTTGCATACAGAACCC
	Reverse	TTTACGATTACACCCAGACTGC
18S	Forward	CGCCGCTAGAGGTGAAATTC
	Reverse	TTGGCAAATGCTTTCGCTC
GAPDH	Forward	GGAGCGAGATCCCTCCAAAAT
	Reverse	GGCTGTTGTCATACTTCTCATGG
TBP	Forward	CCCGAAACGCCGAATATAATCC
	Reverse	AATCAGTGCCGTGGTTCGTG
Primers for EMT profiling in metastatic sub-clones
CDH1	Forward	GACCGGTGCAATCTTCAAA
	Reverse	TTGACGCCGAGAGCTACAC
CDH2	Forward	CCACCTTAAAATCTGCAGGC
	Reverse	GTGCATGAAGGACAGCTTCT
SNAI2	Forward	TGACCTGTCTGCAAATGCTC
	Reverse	CAGACCCTGGTTGCTTCAA
TWIST	Forward	TCCATTTTCTCCTTCTCTGGAA
	Reverse	GTCCGCGTCCCACTAGC
ZEB1	Forward	TGCAGTTTGTCTTCATCATCTG
	Reverse	CCAGGTGTAAGCGCAGAAA
ZEB2	Forward	TCCCAATTCTGGAGTAAAGTCTC
	Reverse	GCCACAAATGAAAGTCCTGG
VIM	Forward	ATTCCACTTTGCGTTCAAGG
	Reverse	CTTCAGAGAGAGGAAGCCGA
